# Supplementary material for: Identification and validation an anoikis-related gene signature for clinical diagnosis, prognosis and treatment of patients with hepatocellular carcinoma
Source: Research Square preprint supplement (doi:10.21203/rs.3.rs-4580896/v1), 2024-07-02

Supplement Table S2 The list of 502 anoikis-related genes

Gene Symbol

Full name

Relevance score

BRMS1

PTK2

BRMS1 Transcriptional Repressor And Anoikis Regulator

Protein Tyrosine Kinase 2

14.7102

7.287515

7.26254

NTRK2

BCL2L11

SRC

Neurotrophic Receptor Tyrosine Kinase 2

BCL2 Like 11

6.691599

6.184272

6.103184

5.463298

5.40746

SRC Proto-Oncogene, Non-Receptor Tyrosine Kinase

CEA Cell Adhesion Molecule 6

Caveolin 1

CEACAM6

CAV1

AKT1

AKT Serine/Threonine Kinase 1

Integrin Subunit Beta 1

ITGB1

CEACAM5

EGFR

5.002957

4.655791

4.615613

4.541405

4.488767

4.375074

4.192896

4.140685

4.070988

3.988476

3.976931

3.940119

3.734493

3.73254

CEA Cell Adhesion Molecule 5

Epidermal Growth Factor Receptor

BCL2 Apoptosis Regulator

BCL2

CASP8

SIK1

Caspase 8

Salt Inducible Kinase 1

PTRH2

STAT3

TLE1

Peptidyl-TRNA Hydrolase 2

Signal Transducer And Activator Of Transcription 3

TLE Family Member 1, Transcriptional Corepressor

Death Associated Protein Kinase 2

Catenin Beta 1

DAPK2

CTNNB1

ZNF304

MAPK1

BMF

Zinc Finger Protein 304

Mitogen-Activated Protein Kinase 1

Bcl2 Modifying Factor

ITGA5

TP53

Integrin Subunit Alpha 5

3.677547

3.639736

3.579083

3.362039

3.11994

Tumor Protein P53

MCL1

MCL1 Apoptosis Regulator, BCL2 Family Member

BCL2 Like 1

BCL2L1

CASP3

CDH1

Caspase 3

Cadherin 1

3.059575

2.96305

BAD

BCL2 Associated Agonist Of Cell Death

Phosphatidylinositol-4,5-Bisphosphate 3-Kinase Catalytic Subunit

Alpha

PIK3CA

2.942048

PAK1

P21 (RAC1) Activated Kinase 1

Integrin Subunit Alpha V

2.93086

2.875284

2.821428

2.729859

2.692126

2.548128

2.548128

2.518463

2.433978

2.417242

2.415361

ITGAV

FN1

Fibronectin 1

MAPK3

PTGS2

BAX

Mitogen-Activated Protein Kinase 3

Prostaglandin-Endoperoxide Synthase 2

BCL2 Associated X, Apoptosis Regulator

BCAR1 Scaffold Protein, Cas Family Member

Phosphatase And Tensin Homolog

Erb-B2 Receptor Tyrosine Kinase 2

Angiopoietin Like 4

BCAR1

PTEN

ERBB2

ANGPTL4

PDK4

Pyruvate Dehydrogenase Kinase 4


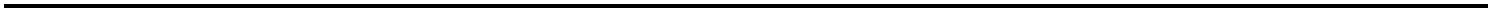

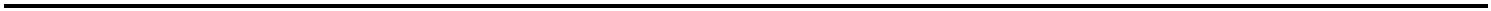

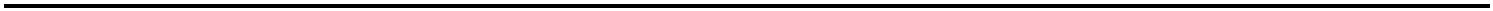


CYCS

BRAF

YAP1

Cytochrome C, Somatic

2.339439

2.335299

2.33217

B-Raf Proto-Oncogene, Serine/Threonine Kinase

Yes1 Associated Transcriptional Regulator

Ankyrin Repeat Domain 13C

Integrin Subunit Alpha 2

ANKRD13C

ITGA2

ANXA5

BIRC5

MTOR

TIMP1

BDNF

CSPG4

BSG

2.329537

2.298167

2.265912

2.255684

2.249703

2.24534

Annexin A5

Baculoviral IAP Repeat Containing 5

Mechanistic Target Of Rapamycin Kinase

TIMP Metallopeptidase Inhibitor 1

Brain Derived Neurotrophic Factor

Chondroitin Sulfate Proteoglycan 4

Basigin (Ok Blood Group)

2.221462

2.195114

2.195114

2.182597

2.150353

2.147692

2.146957

2.10977

AKT2

STK11

IGF1

AKT Serine/Threonine Kinase 2

Serine/Threonine Kinase 11

Insulin Like Growth Factor 1

Insulin Like Growth Factor 1 Receptor

Integrin Subunit Alpha 6

IGF1R

ITGA6

ILK

Integrin Linked Kinase

2.083155

2.083022

2.068578

2.064971

2.0553

CFLAR

RHOA

HIF1A

DAP3

CASP8 And FADD Like Apoptosis Regulator

Ras Homolog Family Member A

Hypoxia Inducible Factor 1 Subunit Alpha

Death Associated Protein 3

MYBBP1A

TLE5

MYB Binding Protein 1a

2.020877

1.998172

1.998085

1.99505

TLE Family Member 5, Transcriptional Modulator

Integrin Subunit Alpha 3

ITGA3

PTK2B

CCND1

CTTN

CALR

ATF4

Protein Tyrosine Kinase 2 Beta

Cyclin D1

1.981372

1.981372

1.944715

1.944715

1.931936

1.907844

1.907844

1.907213

1.883366

1.879978

1.870717

Cortactin

Calreticulin

Activating Transcription Factor 4

CUB Domain Containing Protein 1

Plasminogen Activator, Urokinase Receptor

S-Phase Kinase Associated Protein 2

Checkpoint Kinase 2

CDCP1

PLAUR

SKP2

CHEK2

HGF

Hepatocyte Growth Factor

E2F1

E2F Transcription Factor 1

EGF

Epidermal Growth Factor

Phosphatidylinositol-4,5-Bisphosphate 3-Kinase Catalytic Subunit

Gamma

PIK3CG

1.86744

ITGB4

Integrin Subunit Beta 4

1.855637

1.845545

1.839446

1.820627

1.81566

DAPK1

MAPK8

PIK3R1

PIK3R3

Death Associated Protein Kinase 1

Mitogen-Activated Protein Kinase 8

Phosphoinositide-3-Kinase Regulatory Subunit 1

Phosphoinositide-3-Kinase Regulatory Subunit 3


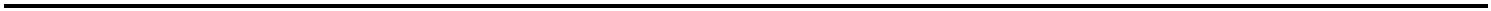

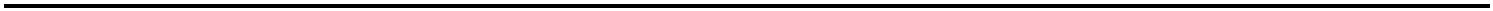


MAP2K1

CXCL12

LGALS3

FBXW7-AS1

BAK1

Mitogen-Activated Protein Kinase Kinase 1

C-X-C Motif Chemokine Ligand 12

Galectin 3

1.79616

1.77687

1.741451

1.73386

FBXW7 Antisense RNA 1

BCL2 Antagonist/Killer 1

1.730096

1.706411

1.702935

1.689653

1.689653

1.689653

1.685504

1.685504

1.672284

1.672284

1.672284

1.666558

1.654234

1.654234

1.654234

1.654234

1.635414

1.635414

1.635414

1.635414

1.618418

1.615718

1.615718

ABHD4

CD44

Abhydrolase Domain Containing 4, N-Acyl Phospholipase B

CD44 Molecule (Indian Blood Group)

Integrin Subunit Alpha 4

ITGA4

FADD

Fas Associated Via Death Domain

Pleckstrin Homology Like Domain Family A Member 2

Transforming Growth Factor Beta 1

Hemicentin 1

PHLDA2

TGFB1

HMCN1

MMP2

Matrix Metallopeptidase 2

CEBPB

CEMIP

CDKN3

CBL

CCAAT Enhancer Binding Protein Beta

Cell Migration Inducing Hyaluronidase 1

Cyclin Dependent Kinase Inhibitor 3

Cbl Proto-Oncogene

CASP9

SFN

Caspase 9

Stratifin

MTDH

PRKCA

TNFRSF10B

CXCL8

MIR200C

AR

Metadherin

Protein Kinase C Alpha

TNF Receptor Superfamily Member 10b

C-X-C Motif Chemokine Ligand 8

MicroRNA 200c

Androgen Receptor

CDKN2A

CPT1A

Cyclin Dependent Kinase Inhibitor 2A

Carnitine Palmitoyltransferase 1A

Phosphatidylinositol-4,5-Bisphosphate 3-Kinase Catalytic Subunit

Beta

PIK3CB

1.615718

CLDN1

MIR204

MIR26A1

CDKN1A

CDKN1B

KLF12

Claudin 1

1.615718

1.615718

1.615718

1.595009

1.595009

1.595009

1.573605

1.573115

1.573115

1.573115

1.573115

1.573115

1.573115

1.573115

1.573115

MicroRNA 204

MicroRNA 26a-1

Cyclin Dependent Kinase Inhibitor 1A

Cyclin Dependent Kinase Inhibitor 1B

KLF Transcription Factor 12

Neurotrophic Receptor Tyrosine Kinase 1

Plasminogen Activator, Urokinase

MYC Proto-Oncogene, BHLH Transcription Factor

SMAD Family Member 4

NTRK1

PLAU

MYC

SMAD4

PLK1

Polo Like Kinase 1

MUC1

Mucin 1, Cell Surface Associated

Galectin 1

LGALS1

PYCARD

SESN2

PYD And CARD Domain Containing

Sestrin 2


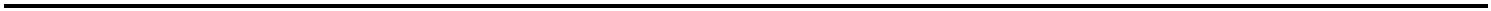

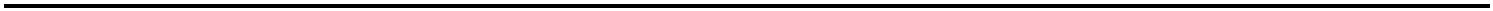


ITGB3

KRAS

THBS1

BID

Integrin Subunit Beta 3

1.568464

1.568464

1.549803

1.549803

1.535089

1.524758

1.524758

1.518128

1.497523

1.497523

1.497523

1.467398

1.467398

1.461561

1.461561

1.448279

1.438149

1.436139

1.436139

1.433205

1.398545

1.395647

1.395647

1.392646

1.392646

1.392646

1.374343

1.374343

1.374343

1.374343

1.370602

1.353635

1.353635

1.352577

1.351373

1.343367

1.331741

1.331741

1.331741

1.313242

1.308429

1.308429

1.308429

1.308429

KRAS Proto-Oncogene, GTPase

Thrombospondin 1

BH3 Interacting Domain Death Agonist

HRas Proto-Oncogene, GTPase

Cyclin Dependent Kinase 11B

Cyclin Dependent Kinase 11A

X-Linked Inhibitor Of Apoptosis

Peroxisome Proliferator Activated Receptor Gamma

Interleukin 6

HRAS

CDK11B

CDK11A

XIAP

PPARG

IL6

MIR145

CCR7

MicroRNA 145

C-C Motif Chemokine Receptor 7

Mesothelin

MSLN

RAC1

Rac Family Small GTPase 1

Grainyhead Like Transcription Factor 2

Baculoviral IAP Repeat Containing 3

Notch Receptor 1

GRHL2

BIRC3

NOTCH1

RHOG

CCAR2

NQO1

MMP13

FAS

Ras Homolog Family Member G

Cell Cycle And Apoptosis Regulator 2

NAD(P)H Quinone Dehydrogenase 1

Matrix Metallopeptidase 13

Fas Cell Surface Death Receptor

Metastasis Associated 1

MTA1

MYO5A

EDA2R

CCN6

Myosin VA

Ectodysplasin A2 Receptor

Cellular Communication Network Factor 6

Matrix Metallopeptidase 9

MMP9

ABL1

ABL Proto-Oncogene 1, Non-Receptor Tyrosine Kinase

Mitogen-Activated Protein Kinase 11

Superoxide Dismutase 2

MAPK11

SOD2

PTHLH

PDGFB

GLI2

Parathyroid Hormone Like Hormone

Platelet Derived Growth Factor Subunit B

GLI Family Zinc Finger 2

EZH2

Enhancer Of Zeste 2 Polycomb Repressive Complex 2 Subunit

Receptor Interacting Serine/Threonine Kinase 1

C-X-C Motif Chemokine Receptor 4

High Mobility Group AT-Hook 1

Salt Inducible Kinase 2

RIPK1

CXCR4

HMGA1

SIK2

TNFSF10

ANGPTL2

S100A4

NTF3

TNF Superfamily Member 10

Angiopoietin Like 2

S100 Calcium Binding Protein A4

Neurotrophin 3

ETV4

ETS Variant Transcription Factor 4

MicroRNA 21

MIR21


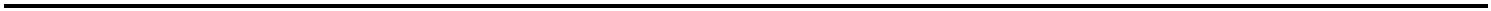

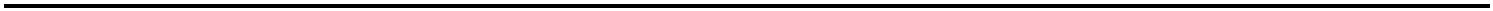


MIR124-1

HTRA1

LATS1

CEACAM3

EIF2AK3

LAMC2

LAMA3

LAMB3

CDH2

MicroRNA 124-1

1.308429

1.283384

1.283384

1.283384

1.280375

1.280375

1.280375

1.280375

1.260679

1.260679

1.260679

1.256149

1.256149

1.239971

1.239971

1.239971

1.226024

1.226024

1.226024

1.218076

1.218076

1.218076

1.218076

1.212177

1.194765

1.194765

1.194765

1.194765

1.194765

1.194765

1.194765

1.194765

1.194765

1.194765

1.194765

1.194765

1.194765

1.194765

1.191831

1.191831

1.191831

1.185631

1.184292

1.16972

HtrA Serine Peptidase 1

Large Tumor Suppressor Kinase 1

CEA Cell Adhesion Molecule 3

Eukaryotic Translation Initiation Factor 2 Alpha Kinase 3

Laminin Subunit Gamma 2

Laminin Subunit Alpha 3

Laminin Subunit Beta 3

Cadherin 2

CSNK2A1

EDIL3

Casein Kinase 2 Alpha 1

EGF Like Repeats And Discoidin Domains 3

Zinc Finger E-Box Binding Homeobox 2

Talin 1

ZEB2

TLN1

EPHA2

SIRT3

EPH Receptor A2

Sirtuin 3

OLFM3

CLU

Olfactomedin 3

Clusterin

SPINK1

CPEB2

NAT1

Serine Peptidase Inhibitor Kazal Type 1

Cytoplasmic Polyadenylation Element Binding Protein 2

N-Acetyltransferase 1

TSG101

MIR200A

MIR6744

SERPINA1

AKT3

Tumor Susceptibility 101

MicroRNA 200a

MicroRNA 6744

Serpin Family A Member 1

AKT Serine/Threonine Kinase 3

RELA Proto-Oncogene, NF-KB Subunit

TNF Receptor Superfamily Member 1A

Fas Ligand

RELA

TNFRSF1A

FASLG

AFP

Alpha Fetoprotein

ITGA8

NOX4

Integrin Subunit Alpha 8

NADPH Oxidase 4

PBK

PDZ Binding Kinase

SATB1

CD63

SATB Homeobox 1

CD63 Molecule

EEF1A1

LTB4R2

MAVS

HRC

Eukaryotic Translation Elongation Factor 1 Alpha 1

Leukotriene B4 Receptor 2

Mitochondrial Antiviral Signaling Protein

Histidine Rich Calcium Binding Protein

Cellular Communication Network Factor 2

Ras Homolog Family Member B

Protein Phosphatase 1 Regulatory Subunit 13B

Plasminogen

CCN2

RHOB

PPP1R13B

PLG

MET

MET Proto-Oncogene, Receptor Tyrosine Kinase

Raf-1 Proto-Oncogene, Serine/Threonine Kinase

RAF1


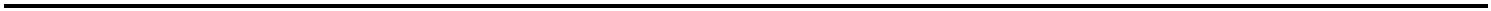

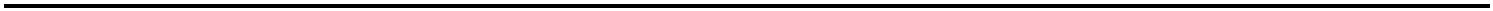


PARP1

PRKCQ

BRCA2

RB1

Poly(ADP-Ribose) Polymerase 1

Protein Kinase C Theta

1.16972

1.16972

1.16972

1.16972

1.16972

1.16972

1.16972

1.16972

1.16972

1.16972

1.16972

1.16972

1.16972

1.16972

1.16972

1.16972

1.16972

1.151272

1.142485

1.142485

1.142485

1.142485

1.142485

1.142485

1.142485

1.142485

1.142485

1.142485

1.142485

1.142485

BRCA2 DNA Repair Associated

RB Transcriptional Corepressor 1

Sp1 Transcription Factor

SP1

HAVCR2

DOCK1

VTN

Hepatitis A Virus Cellular Receptor 2

Dedicator Of Cytokinesis 1

Vitronectin

INHBB

PDCD4

PRPF4B

RANBP9

SESN1

SESN3

CD24

Inhibin Subunit Beta B

Programmed Cell Death 4

Pre-MRNA Processing Factor 4B

RAN Binding Protein 9

Sestrin 1

Sestrin 3

CD24 Molecule

ZBTB7A

MIR141

ELANE

KDR

Zinc Finger And BTB Domain Containing 7A

MicroRNA 141

Elastase, Neutrophil Expressed

Kinase Insert Domain Receptor

MDM2 Proto-Oncogene

MDM2

NFE2L2

ZEB1

NFE2 Like BZIP Transcription Factor 2

Zinc Finger E-Box Binding Homeobox 1

Klotho

KL

PRKCI

CRYAB

EPHB6

FGF2

Protein Kinase C Iota

Crystallin Alpha B

EPH Receptor B6

Fibroblast Growth Factor 2

Hexokinase 2

HK2

LTF

Lactotransferrin

IQGAP1

IQ Motif Containing GTPase Activating Protein 1

Alpha-1,6-Mannosylglycoprotein 6-Beta-N-

Acetylglucosaminyltransferase

Syndecan Binding Protein

Abhydrolase Domain Containing 2, Acylglycerol Lipase

Spi-B Transcription Factor

Tripartite Motif Containing 31

MicroRNA 1827

MGAT5

1.142485

SDCBP

ABHD2

SPIB

1.142485

1.142485

1.142485

1.142485

1.142485

1.11236

1.11236

1.11236

1.11236

1.11236

1.11236

1.11236

TRIM31

MIR1827

PDGFRB

PLAT

Platelet Derived Growth Factor Receptor Beta

Plasminogen Activator, Tissue Type

Toll Like Receptor 3

TLR3

NRAS

NRAS Proto-Oncogene, GTPase

Rho Associated Coiled-Coil Containing Protein Kinase 1

P21 (RAC1) Activated Kinase 4

Vascular Endothelial Growth Factor A

ROCK1

PAK4

VEGFA


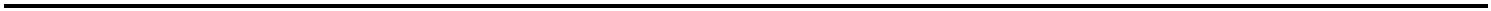

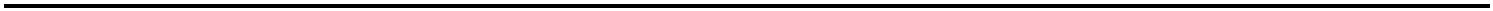


CASP10

PIN1

Caspase 10

1.11236

1.11236

1.11236

1.11236

Peptidylprolyl Cis/Trans Isomerase, NIMA-Interacting 1

Interleukin 1 Receptor Accessory Protein

Ubiquitin Conjugating Enzyme E2 C

Tyrosine 3-Monooxygenase/Tryptophan 5-Monooxygenase

Activation Protein Zeta

IL1RAP

UBE2C

YWHAZ

1.11236

TWIST1

BMP6

Twist Family BHLH Transcription Factor 1

Bone Morphogenetic Protein 6

BCL2 Interacting Protein 3 Like

ETS Transcription Factor ELK1

Lysine Demethylase 3A

1.11236

1.11236

BNIP3L

ELK1

1.11236

1.11236

KDM3A

PRDX4

BNIP3

1.11236

Peroxiredoxin 4

1.11236

BCL2 Interacting Protein 3

1.11236

LMO3

LIM Domain Only 3

1.11236

ZNF32

MIR200B

MIR525

MIR363

TUBB3

HSP90B1

SLC2A1

HMOX1

PTPN11

PRKACA

PAK3

Zinc Finger Protein 32

1.11236

MicroRNA 200b

1.11236

MicroRNA 525

1.11236

MicroRNA 363

1.11236

Tubulin Beta 3 Class III

1.098414

1.098414

1.078167

1.078167

1.078167

1.078167

1.078167

1.078167

1.078167

1.078167

1.078167

1.078167

1.078167

1.078167

1.078167

1.078167

1.078167

1.078167

1.078167

1.078167

1.078167

1.078167

1.078167

1.078167

1.078167

1.078167

Heat Shock Protein 90 Beta Family Member 1

Solute Carrier Family 2 Member 1

Heme Oxygenase 1

Protein Tyrosine Phosphatase Non-Receptor Type 11

Protein Kinase CAMP-Activated Catalytic Subunit Alpha

P21 (RAC1) Activated Kinase 3

CD36 Molecule

CD36

PIK3R2

PPP2CA

CASP6

CDH3

Phosphoinositide-3-Kinase Regulatory Subunit 2

Protein Phosphatase 2 Catalytic Subunit Alpha

Caspase 6

Cadherin 3

EEF2K

LRP1

Eukaryotic Elongation Factor 2 Kinase

LDL Receptor Related Protein 1

P21 (RAC1) Activated Kinase 2

Protein Tyrosine Kinase 6

PAK2

PTK6

LPAR1

TCF7L2

CEACAM1

GDF2

Lysophosphatidic Acid Receptor 1

Transcription Factor 7 Like 2

CEA Cell Adhesion Molecule 1

Growth Differentiation Factor 2

Glyoxalase I

GLO1

IL17A

Interleukin 17A

RBL2

RB Transcriptional Corepressor Like 2

Signal Regulatory Protein Alpha

TNF Receptor Associated Factor 2

Adenylate Cyclase 10

SIRPA

TRAF2

ADCY10


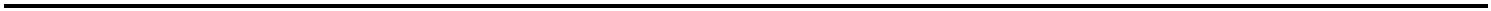

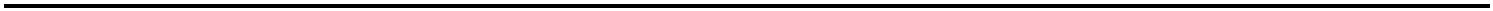


VPS37A

TNFRSF12A

APOBEC3G

BAG1

VPS37A Subunit Of ESCRT-I

1.078167

1.078167

1.078167

1.078167

1.078167

1.078167

1.078167

1.078167

1.078167

1.078167

1.078167

1.050075

1.037607

1.037607

1.037607

1.037607

1.037607

1.037607

1.037607

1.037607

1.037607

1.037607

1.037607

1.037607

1.037607

1.037607

1.037607

1.037607

1.037607

1.037607

1.037607

1.037607

1.037607

1.037607

1.037607

1.037607

1.016699

0.984749

0.984749

0.984749

0.984749

0.984749

0.984749

0.984749

TNF Receptor Superfamily Member 12A

Apolipoprotein B MRNA Editing Enzyme Catalytic Subunit 3G

BAG Cochaperone 1

COL13A1

MNX1

Collagen Type XIII Alpha 1 Chain

Motor Neuron And Pancreas Homeobox 1

RAD9 Checkpoint Clamp Component A

Interferon Alpha Inducible Protein 27

Multiple EGF Like Domains 11

Inositol 1,4,5-Trisphosphate Receptor Interacting Protein

BCL2 Like 15

RAD9A

IFI27

MEGF11

ITPRIP

BCL2L15

SNAI2

Snail Family Transcriptional Repressor 2

Protein Tyrosine Phosphatase Non-Receptor Type 1

Notch Receptor 3

PTPN1

NOTCH3

GLUD1

SIRT1

Glutamate Dehydrogenase 1

Sirtuin 1

FASN

Fatty Acid Synthase

MYH9

Myosin Heavy Chain 9

RPS6KB1

TPM1

Ribosomal Protein S6 Kinase B1

Tropomyosin 1

PPP2R1A

COL4A2

CTNND1

CD151

Protein Phosphatase 2 Scaffold Subunit Aalpha

Collagen Type IV Alpha 2 Chain

Catenin Delta 1

CD151 Molecule (Raph Blood Group)

Matrix Metallopeptidase 11

MMP11

ARHGEF7

PPP2R2A

SEMA7A

PPP2R5A

BST2

Rho Guanine Nucleotide Exchange Factor 7

Protein Phosphatase 2 Regulatory Subunit Balpha

Semaphorin 7A (John Milton Hagen Blood Group)

Protein Phosphatase 2 Regulatory Subunit B'Alpha

Bone Marrow Stromal Cell Antigen 2

Cellular Communication Network Factor 1

Protein Phosphatase 2 Regulatory Subunit Bdelta

Coiled-Coil Domain Containing 178

MicroRNA 10a

CCN1

PPP2R2D

CCDC178

MIR10A

MIR30B

MIR30C1

SHC1

MicroRNA 30b

MicroRNA 30c-1

SHC Adaptor Protein 1

BUB1

BUB1 Mitotic Checkpoint Serine/Threonine Kinase

Cell Division Cycle 25C

CDC25C

CDK1

Cyclin Dependent Kinase 1

ITGB5

Integrin Subunit Beta 5

SETD2

SET Domain Containing 2, Histone Lysine Methyltransferase

BUB3 Mitotic Checkpoint Protein

FER Tyrosine Kinase

BUB3

FER


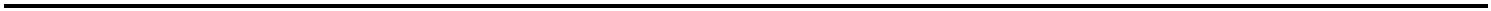

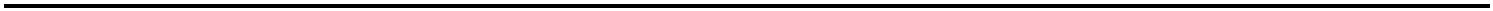


TP73

Tumor Protein P73

0.984749

0.984749

0.984749

0.984749

0.984749

0.984749

0.984749

0.984749

0.984749

0.984749

0.984749

0.958522

0.920355

0.917962

0.857139

0.857139

0.857139

0.857139

0.857139

0.83795

SLCO1B3

TDGF1

DLG1

Solute Carrier Organic Anion Transporter Family Member 1B3

Teratocarcinoma-Derived Growth Factor 1

Discs Large MAGUK Scaffold Protein 1

Ectodysplasin A Receptor

EDAR

MAD2L1

BCL2L2

PDCD6IP

SH3GLB1

SCRIB

Mitotic Arrest Deficient 2 Like 1

BCL2 Like 2

Programmed Cell Death 6 Interacting Protein

SH3 Domain Containing GRB2 Like, Endophilin B1

Scribble Planar Cell Polarity Protein

Dynein Light Chain LC8-Type 2

TSC Complex Subunit 2

DYNLL2

TSC2

BAG4

BAG Cochaperone 4

MAP3K7

F10

Mitogen-Activated Protein Kinase Kinase Kinase 7

Coagulation Factor X

F3

Coagulation Factor III, Tissue Factor

ADAMTS Like 1

ADAMTSL1

SERPINB1

MIR181A1

MAP3K1

CTBP1

Serpin Family B Member 1

MicroRNA 181a-1

Mitogen-Activated Protein Kinase Kinase Kinase 1

C-Terminal Binding Protein 1

CEA Cell Adhesion Molecule 4

Paxillin

0.83795

CEACAM4

PXN

0.803757

0.791615

0.787873

0.763197

0.763197

MALAT1

GSTP1

Metastasis Associated Lung Adenocarcinoma Transcript 1

Glutathione S-Transferase Pi 1

Peroxiredoxin 1

PRDX1

Inhibitor Of Nuclear Factor Kappa B Kinase Regulatory Subunit

Gamma

IKBKG

0.737493

TFDP1

CRYBA1

SERPINE1

FOXO3

ACTG1

ARHGDIA

EZR

Transcription Factor Dp-1

0.737493

0.737493

0.730513

0.729289

0.710339

0.710339

0.710339

0.710339

0.700655

0.700655

0.69632

Crystallin Beta A1

Serpin Family E Member 1

Forkhead Box O3

Actin Gamma 1

Rho GDP Dissociation Inhibitor Alpha

Ezrin

SLC39A6

BIN1

Solute Carrier Family 39 Member 6

Bridging Integrator 1

TIAM1

PDPK1

SMAD7

NTRK3

RHOC

TIAM Rac1 Associated GEF 1

3-Phosphoinositide Dependent Protein Kinase 1

SMAD Family Member 7

0.673421

0.643296

0.643296

0.635348

0.612036

Neurotrophic Receptor Tyrosine Kinase 3

Ras Homolog Family Member C

Caspase 2

CASP2

TNC

Tenascin C


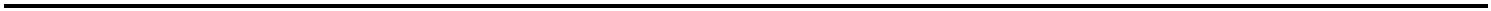

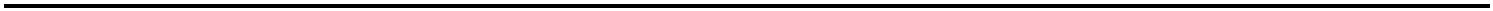


IRF6

Interferon Regulatory Factor 6

HOX Transcript Antisense RNA

Glucosamine (UDP-N-Acetyl)-2-Epimerase/N-

Acetylmannosamine Kinase

0.612036

0.609103

HOTAIR

GNE

0.586991

XAF1

XIAP Associated Factor 1

0.586991

0.582729

0.568543

0.568543

SFRP1

MAP2K2

CSK

Secreted Frizzled Related Protein 1

Mitogen-Activated Protein Kinase Kinase 2

C-Terminal Src Kinase

Phosphatidylinositol-4-Phosphate 3-Kinase Catalytic Subunit

Type 2 Beta

PIK3C2B

0.568543

TAGLN

ENDOG

FOXC2

RACK1

ARHGDIB

FBLIM1

CCDC80

PRKD1

LDHA

Transgelin

0.568543

0.568543

0.568543

0.568543

0.568543

0.568543

0.568543

0.559756

0.529631

0.529631

0.529631

Endonuclease G

Forkhead Box C2

Receptor For Activated C Kinase 1

Rho GDP Dissociation Inhibitor Beta

Filamin Binding LIM Protein 1

Coiled-Coil Domain Containing 80

Protein Kinase D1

Lactate Dehydrogenase A

ANXA2

SPP1

Annexin A2

Secreted Phosphoprotein 1

SWI/SNF Related, Matrix Associated, Actin Dependent Regulator

Of Chromatin, Subfamily E, Member 1

Quiescin Sulfhydryl Oxidase 1

RNA Binding Fox-1 Homolog 2

Ribosomal Protein S6 Kinase A3

Cell Division Cycle 42

SMARCE1

0.529631

QSOX1

RBFOX2

RPS6KA3

CDC42

MAOA

PIP5K1C

ATF2

0.529631

0.529631

0.495438

0.495438

0.495438

0.495438

0.495438

0.495438

0.495438

0.495438

0.495438

0.495438

0.495438

0.495438

0.495438

0.495438

0.454879

0.454879

0.454879

0.454879

0.454879

Monoamine Oxidase A

Phosphatidylinositol-4-Phosphate 5-Kinase Type 1 Gamma

Activating Transcription Factor 2

Junction Plakoglobin

JUP

NDRG1

NKX2-1

OCLN

N-Myc Downstream Regulated 1

NK2 Homeobox 1

Occludin

CRABP2

ID2

Cellular Retinoic Acid Binding Protein 2

Inhibitor Of DNA Binding 2

CEACAM8

PITPNC1

AFAP1L1

INSR

CEA Cell Adhesion Molecule 8

Phosphatidylinositol Transfer Protein Cytoplasmic 1

Actin Filament Associated Protein 1 Like 1

Insulin Receptor

HSPB1

NGF

Heat Shock Protein Family B (Small) Member 1

Nerve Growth Factor

PCNA

Proliferating Cell Nuclear Antigen

Glycogen Synthase Kinase 3 Beta

GSK3B


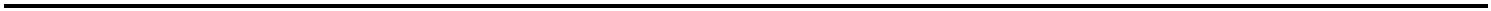

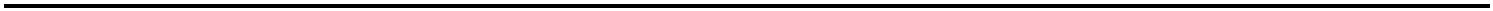


TP63

Tumor Protein P63

0.454879

0.454879

0.454879

0.454879

0.454879

0.454879

0.454879

0.454879

0.454879

0.454879

0.454879

0.454879

0.454879

0.454879

0.454879

0.454879

0.454879

0.454879

0.454879

0.402021

0.402021

0.402021

0.402021

0.402021

0.402021

0.402021

0.402021

0.402021

0.402021

0.402021

0.402021

0.402021

0.402021

0.402021

0.402021

0.402021

0.402021

0.402021

0.402021

0.402021

0.402021

0.402021

0.402021

0.402021

KRT14

SPHK1

CTNNA1

EHMT2

OGT

Keratin 14

Sphingosine Kinase 1

Catenin Alpha 1

Euchromatic Histone Lysine Methyltransferase 2

O-Linked N-Acetylglucosamine (GlcNAc) Transferase

Rac Family Small GTPase 3

Sirtuin 6

RAC3

SIRT6

ACP1

Acid Phosphatase 1

FOXA1

STK38

RHOQ

ONECUT1

S100A7

SRSF3

MUC4

GKN1

Forkhead Box A1

Serine/Threonine Kinase 38

Ras Homolog Family Member Q

One Cut Homeobox 1

S100 Calcium Binding Protein A7

Serine And Arginine Rich Splicing Factor 3

Mucin 4, Cell Surface Associated

Gastrokine 1

MIR107

MIR630

DNMT1

LCK

MicroRNA 107

MicroRNA 630

DNA Methyltransferase 1

LCK Proto-Oncogene, Src Family Tyrosine Kinase

MER Proto-Oncogene, Tyrosine Kinase

Ubiquitin C-Terminal Hydrolase L1

Cyclin Dependent Kinase 2

Matrix Metallopeptidase 3

MERTK

UCHL1

CDK2

MMP3

ACTB

BRCA1

SLC2A2

NOS2

Actin Beta

BRCA1 DNA Repair Associated

Solute Carrier Family 2 Member 2

Nitric Oxide Synthase 2

USP9X

ROR1

Ubiquitin Specific Peptidase 9 X-Linked

Receptor Tyrosine Kinase Like Orphan Receptor 1

FYN Proto-Oncogene, Src Family Tyrosine Kinase

Heat Shock Protein Family A (Hsp70) Member 1A

HtrA Serine Peptidase 2

FYN

HSPA1A

HTRA2

SNAI1

C5AR1

LATS2

PRDM1

SKI

Snail Family Transcriptional Repressor 1

Complement C5a Receptor 1

Large Tumor Suppressor Kinase 2

PR/SET Domain 1

SKI Proto-Oncogene

TPP2

Tripeptidyl Peptidase 2

XRCC5

CLDN18

SPTA1

THY1

X-Ray Repair Cross Complementing 5

Claudin 18

Spectrin Alpha, Erythrocytic 1

Thy-1 Cell Surface Antigen


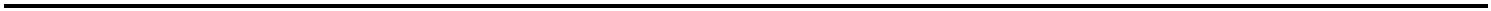

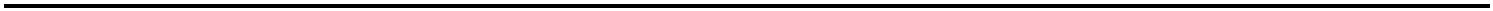


TJP1

Tight Junction Protein 1

Caudal Type Homeobox 2

Centromere Protein F

0.402021

0.402021

0.402021

0.402021

0.402021

0.402021

0.402021

0.402021

0.402021

0.402021

0.402021

0.402021

0.402021

0.402021

0.402021

0.402021

0.402021

0.402021

0.402021

0.402021

0.402021

0.402021

0.402021

0.402021

0.402021

0.402021

0.402021

0.402021

CDX2

CENPF

DOK2

Docking Protein 2

S100A11

SERPINB5

CLIC4

S100 Calcium Binding Protein A11

Serpin Family B Member 5

Chloride Intracellular Channel 4

IKAROS Family Zinc Finger 3

Synuclein Gamma

IKZF3

SNCG

USP11

Ubiquitin Specific Peptidase 11

ELAV Like RNA Binding Protein 1

Homeobox A10

ELAVL1

HOXA10

LGALS8

SRPX2

SLPI

Galectin 8

Sushi Repeat Containing Protein X-Linked 2

Secretory Leukocyte Peptidase Inhibitor

HtrA Serine Peptidase 3

EF-Hand Domain Family Member D2

Iroquois Homeobox 1

HTRA3

EFHD2

IRX1

CXCL14

KIF18A

ZG16B

SBSN

C-X-C Motif Chemokine Ligand 14

Kinesin Family Member 18A

Zymogen Granule Protein 16B

Suprabasin

MIR223

MIR503

MIR99A

MIR451A

MIR7-1

SNORA80E

MicroRNA 223

MicroRNA 503

MicroRNA 99a

MicroRNA 451a

MicroRNA 7-1

Small Nucleolar RNA, H/ACA Box 80E


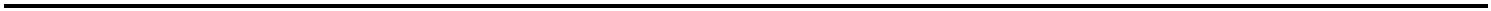

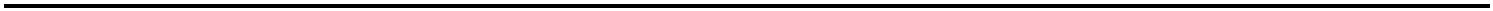

Supplement: Supplementary file 1 [file 410736fe0377be79ff615ca9.docx]
