# Supplementary material for: Identification and validation an anoikis-related gene signature for clinical diagnosis, prognosis and treatment of patients with hepatocellular carcinoma
Source: Research Square preprint supplement (doi:10.21203/rs.3.rs-4580896/v1), 2024-07-02

Supplementary table S1 Clinical Characteristics of the HCC patients involved in the study

Clinical Features

Status

TCGA(n,%)

ICGC(n,%)

GSE14520-3971(n%)

Alive

219(64.0%)

123(36.0%)

189(82.2%)

41(17.8%)

136(61.5%)

85(38.5%)

Dead

Age

≤65

216(63.2%)

89(38.7%)

200(90.5%)

21(9.5%)

>65

126(36.8.3%)

141(61.3%)

Gender

Female

Male

109(31.9%)

233(68.1%)

61(26.5%)

30(13.6%)

169(73.5%)

191(86.4%)

Stage

stage I-II

stage III-IV

unknown

Grade

238(69.6%)

83(24.3.%)

21(6.1%)

142(61.7%)

88(38.3)

170(76.9%)

49(22.2%)

2(0.9%)

NA

NA

NA

NA

G1-2

214(62.6%)

123(36.0%)

5(1.4%)

G3-4

Unknown

T

NA

NA

T1-2

252(73.7%)

87(25.4%)

3(0.9%)

T3-4

Unknown

Vascular Invasion

Micro

85(24.9%)

16(4.7%)

Macro

None

187(54.7%)

54(15.7%)

unknown

Cancer Type

With Tumor

Tumor Free

Unknown

Cancer History

No

NA

NA

NA

145(42.4%)

159(46.5%)

38(11.1%)

193(56.4%)

105(30.7%)

44(12.9%)

200(87.0%)

30(13.0%)

Yes

Unknown


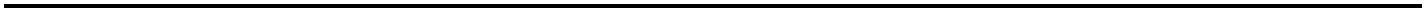

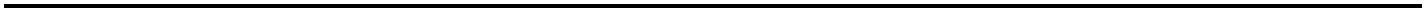

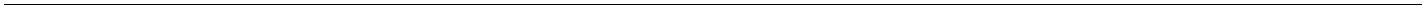

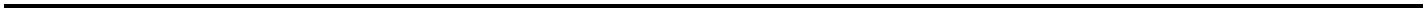

Supplement: Supplementary file 2 [file 81959aaf43f105ae150eea14.docx]
