# Supplementary material for: Identification and validation an anoikis-related gene signature for clinical diagnosis, prognosis and treatment of patients with hepatocellular carcinoma
Source: Research Square preprint supplement (doi:10.21203/rs.3.rs-4580896/v1), 2024-07-02

Supplement Table S3 The primer sequences of four PARDEGs

Gene name

E2F1

Sequence of primer

F: ACGCTATGAGACCTCACTGAA

R: TCCTGGGTCAACCCCTCAAG

CD24

F: CTCCTACCCACGCAGATTTATTC

R: AGAGTGAGACCACGAAGAGAC

NDRG1

SKP2

F: CTCCTGCAAGAGTTTGATGTCC

R: TCATGCCGATGTCATGGTAGG

F: ATGCCCCAATCTTGTCCATCT

R: CACCGACTGAGTGATAGGTGT

F: GTGACGTTGACATCCGTAAAGA

R: GCCGGACTCATCGTACTCC

β-actin


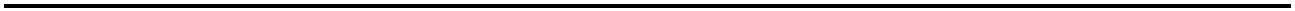

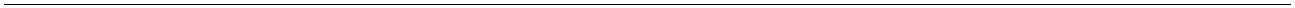

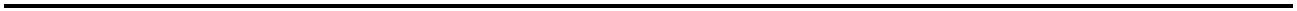

Supplement: Supplementary file 3 [file cbef582d70b8ce8768bddad8.docx]
